# Supplementary material
Source: Springer Nature journal article supplement (https://www.springermedizin.de/resource/supplementary/12876_2010_451_MOESM9_ESM.pdf/9437038)

**No DSS****DSS****C57BL6/J  
(wt)**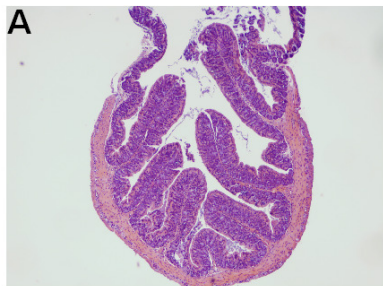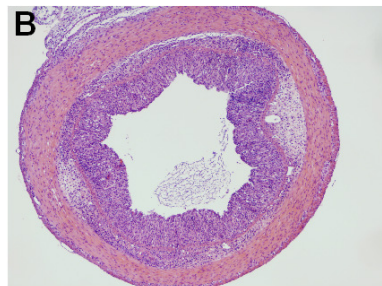**CD4cre**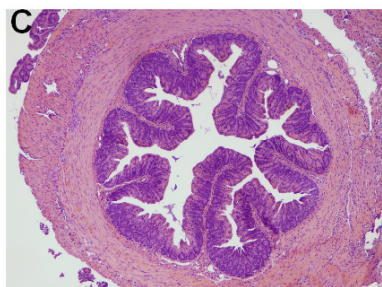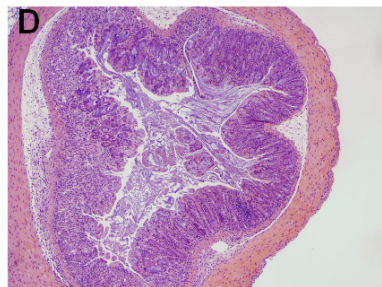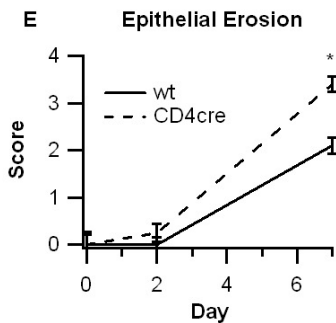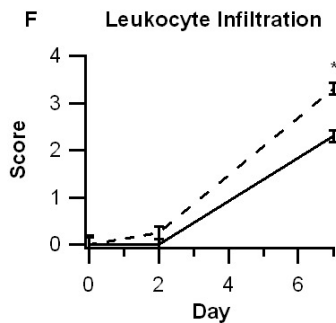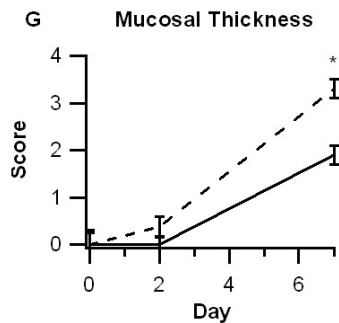

Supplement: MOESM9 [file 9437038]
